# Supplementary material for: Spontaneous CD4+ and CD8+ T‐cell responses directed against cancer testis antigens are present in the peripheral blood of testicular cancer patients
Source: PubMed Central journal article supplement (PMC5519936; doi:10.1002/eji.201646898), 2017-06-26
Supplement: EJI-47-1232-s001.pdf [file EJI-47-1232-s001.pdf]

# European Journal of Immunology

Supporting Information  
for

**DOI 10.1002/eji.201646898**

Hayden Pearce, Paul Hutton, Shalini Chaudhri, Emilio Porfiri, Prashant Patel,  
Richard Viney and Paul Moss

**Spontaneous CD4<sup>+</sup> and CD8<sup>+</sup> T-cell responses directed against cancer testis  
antigens are present in the peripheral blood of testicular cancer patients**

Supplementary Table. 1 Patient characteristics

|                                  |                   | Frequency (number)         |          |
|----------------------------------|-------------------|----------------------------|----------|
| <b>Tumour subtype</b>            | All subtypes      | 100% (72)                  |          |
|                                  | Seminoma          | 66% (48)                   |          |
|                                  | NSGCTT            | 20% (14)                   |          |
|                                  | mGCT              | 14% (10)                   |          |
| <b>Tumour stage</b>              | Seminoma          | Stage 1                    | 81% (39) |
|                                  |                   | Stage 2a                   | 6% (3)   |
|                                  |                   | Stage 2b                   | 11% (5)  |
|                                  |                   | Stage 3                    | 2% (1)   |
|                                  | NSGCTT            | Stage 1 (localised)        | 36% (5)  |
|                                  |                   | LVI -                      | 40% (2)  |
|                                  |                   | LVI +                      | 60% (3)  |
|                                  |                   | Stage 2 (metastatic)       | 64% (9)  |
|                                  |                   | IGCCCG <sup>a</sup> - Good | 89% (8)  |
|                                  |                   | IGCCCG - Intermediate      | 11% (1)  |
|                                  | mGCT              | Stage 1 (localised)        | 90% (9)  |
|                                  |                   | LVI -                      | 67% (6)  |
|                                  |                   | LVI +                      | 33% (3)  |
| Stage 2 (metastatic)             |                   | 10% (1)                    |          |
|                                  | IGCCCG - Good     | 100% (1)                   |          |
| <b>Treatment</b>                 | Seminoma          | 1 x Carboplatin AUC7       | 81% (39) |
|                                  |                   | 3/4 x EP120                | 17% (8)  |
|                                  |                   | Radiotherapy               | 2% (1)   |
|                                  | NSGCTT            | 1 x BEP165                 | 21% (3)  |
|                                  |                   | 2 x BEP120                 | 21% (3)  |
|                                  |                   | 3/4 x BEP165               | 58% (8)  |
|                                  | mGCT              | 1 x BEP165                 | 20% (2)  |
|                                  |                   | 2 x BEP120                 | 60% (6)  |
|                                  |                   | 3 x BEP165                 | 10% (1)  |
|                                  |                   | Surveillance               | 10% (1)  |
| <b>Recurrence within 2 years</b> |                   | 3% (2/72) patients         |          |
| <b>Age</b>                       |                   | Median years (Range)       |          |
|                                  | All TGCT patients | 37 (20 - 57)               |          |
|                                  | Seminoma          | 41 (21 - 57)               |          |
|                                  | NSGCTT            | 25 (20 - 36)               |          |
|                                  | mGCT              | 40 (30 - 48)               |          |
| Healthy donors                   | 30 (23 -51)       |                            |          |

Abbreviations: LVI, Lymphovascular invasion; IGCCCG, International Germ Cell Cancer Collaborative Group; BEP, Bleomycin- Etoposide-Cisplatin; EP Etoposide-Cisplatin

<sup>a</sup>Prognostic classification of metastatic germ cell tumours
